# Supplementary material for: Inhibition of the NF-κB and mTOR targets by urolithin A attenuates d-galactose-induced aging in mice
Source: Royal Society of Chemistry journal article supplement (doi:10.1039/d3fo03847e), 2023-01-01

## Supporting Information

### **Inhibition of the NF- $\kappa$ B and mTOR Targets by Urolithin A Attenuates D-galactose-Induced Aging in Mice**

Mengwei Zhang<sup>a,b</sup>, Xin Tang<sup>a,b,\*</sup>, Bingyong Mao<sup>a,b</sup>, Qiuxiang Zhang<sup>a,b</sup>, Jianxin Zhao<sup>a,b</sup>, Wei Chen<sup>a,b,c</sup>, Shumao Cui<sup>a,b</sup>

<sup>a</sup> State Key Laboratory of Food Science and Resources, Jiangnan University, Wuxi, Jiangsu 214122, P. R. China

<sup>b</sup> School of Food Science and Technology, Jiangnan University, Wuxi, Jiangsu 214122, P. R. China

<sup>c</sup> National Engineering Research Center for Functional Food, Jiangnan University, Wuxi, Jiangsu 214122, P. R. China

**\*Corresponding author:** Xin Tang

**Email:** xintang@jiangnan.edu.cn; **Phone:** 159-6176-3200

1 The following are the Supplementary data to this article:

2 Supplementary Table S1 and Figure S1.

3 **Table S1.** List of primers used for quantitative RT - PCR in mice

| Gene Name       | Primer  | Sequence                       |
|-----------------|---------|--------------------------------|
| <i>actin</i>    | forward | 5'-GAGACCTTCAACACCCC-3'        |
|                 | reverse | 5'-GTGGTGGTGAAGCTGTAGCC-3'     |
| <i>gapdh</i>    | forward | 5'-CATCACTGCCACCCAGAAGACTG-3'  |
|                 | reverse | 5'-ATGCCAGTGAGCTTCCCGTTCAG-3'  |
| <i>pink-1</i>   | forward | 5'-CAGTGTAGAGCGTGGTGGCAAT-3'   |
|                 | reverse | 5'-AGGCACCGACTCAGGCATCT-3'     |
| <i>Parkin</i>   | forward | 5'-GCTTGACACGAGTGGACCTGAG-3'   |
|                 | reverse | 5'-AACTGGACCTCTGGCTGCTTCT-3'   |
| <i>Nup62</i>    | forward | 5'-GCTGAAGGAAGCTGCCCTAT-3'     |
|                 | reverse | 5'-TTGGTCTGTAGGAGCCTGGT-3'     |
| <i>Map1lc3b</i> | forward | 5'-CACTGCTCTGTCTTGTGTAGGTTG-3' |
|                 | reverse | 5'-TCGTTGTGCCTTTATTAGTGCATC-3' |
| <i>mTOR</i>     | forward | 5'-AGAAGGGTCTCCAAGGACGACT-3'   |
|                 | reverse | 5'-GCAGGACACAAAGGCAGCATTG-3'   |
| <i>Nfkb1</i>    | forward | 5'-GCTGCCAAAGAAGGACACGACA-3'   |
|                 | reverse | 5'-GGCAGGCTATTGCTCATCACAG-3'   |

5 **Figure S1.**The levels of autophagy-associated mRNA in gastrocnemius muscle and  
 6 brain tissue. **(A)** mRNA level changes in gastrocnemius muscle. **(B)** mRNA level  
 7 changes in brain.

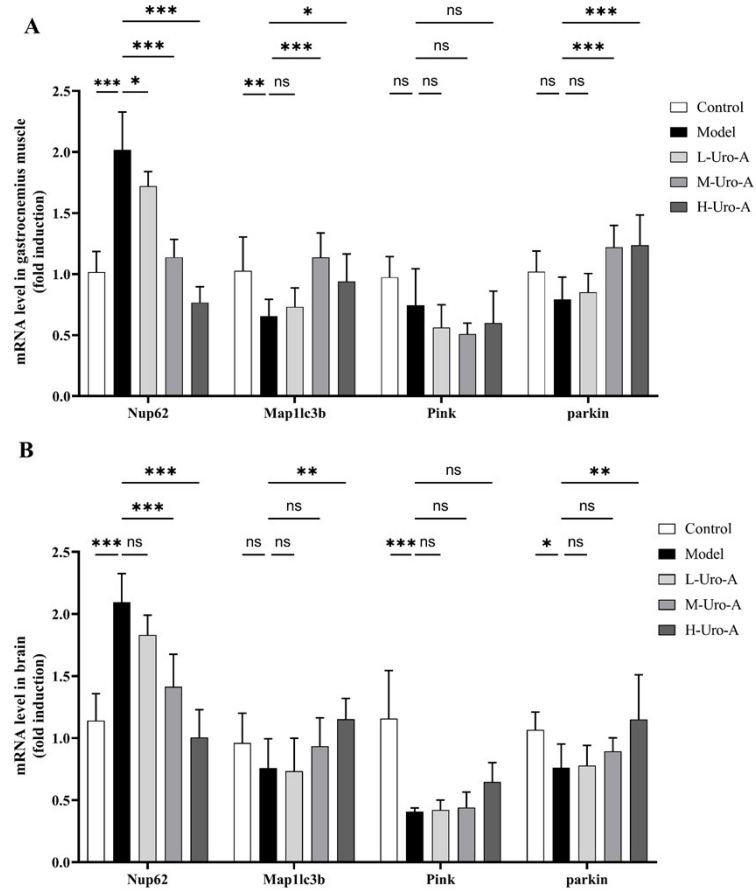

Supplement: d3fo03847e1.pdf [file d3fo03847e1.pdf]
